# Supplementary material for: The mechanism of ionic Diels–Alder reactions. A DFT study of the oxa-Povarov reaction
Source: Royal Society of Chemistry journal article supplement (doi:10.1039/c3ra47805j), 2014-01-01
Supplement: c3ra47805j1.pdf [file c3ra47805j1.pdf]

## SUPPORTING INFORMATION

### The mechanism of ionic Diels-Alder reactions.

### A DFT study of the oxa-Povarov reaction.

Luis R. Domingo<sup>1\*</sup>, Maria J. Aurell<sup>1</sup> and Patricia Pérez<sup>2\*</sup>

<sup>1</sup> Universidad de Valencia, Departamento de Química Orgánica,  
Dr. Moliner 50, E-46100 Burjassot, Valencia, Spain.

<sup>2</sup> Universidad Andrés Bello, Facultad de Ciencias Exactas,  
Departamento de Ciencias Químicas, Laboratorio de Química Teórica,  
Av. República 275, 8370146 Santiago, Chile.

### INDEX

- S2 Table S1.** Total and relative energies in gas phase and DCM of the stationary points involved in the I-DA reaction of oxonium cation **6** with cyclopentene **7**.
- S3 Table S2.** MPWB1K /6-311G\* total (E, in a.u.) and relative energies<sup>a</sup> ( $\Delta E$ , in kcal/mol) in DCM of the stereoisomeric TSs involved in the I-DA reaction of oxonium cation **6** with cyclopentene **7** and styrene **12**.
- S3 Table S3.** Total and relative energies in gas phase and DCM of the stationary points involved in the I-DA reaction of oxonium cation **6** with styrene **12**.
- S4 Figure S1.** B3LYP(DCM)/6-311G\* transition state structures involved in the I-DA reaction between oxonium cation **6** and cyclopentene **7**. Lengths are given in Angstroms.
- S5** B3LYP/6-31G\* computed total energies, unique frequency imaginary, and cartesian coordinates of the stationary points involved in reaction of cationic aryl oxonium **6** with cyclopentene **7**, and with styrene **12**.

**Table S1.** Total (E, in a.u.) and relative energies ( $\Delta E$ ,<sup>a</sup> in kcal/mol) in gas phase and DCM of the stationary points involved in the I-DA reaction of oxonium cation **6** with cyclopentene **7**.

|             | B3LYP/6-31G* |            | B3LYP/6-311G*    |            | B3LYP/6-311G*    |            |
|-------------|--------------|------------|------------------|------------|------------------|------------|
|             | Gas phase    |            | DCM <sup>b</sup> |            | DCM <sup>c</sup> |            |
|             | E            | $\Delta E$ | E                | $\Delta E$ | E                | $\Delta E$ |
| <b>6</b>    | -592.996399  |            | -593.179745      |            | -593.1799581     |            |
| <b>7</b>    | -195.327139  |            | -195.369741      |            | -195.3697785     |            |
| <b>TS1n</b> | -788.324324  | -0.5       | -788.541933      | 4.7        | -788.5422446     | 4.7        |
| <b>TS1x</b> | -788.326419  | -1.8       | -788.543493      | 3.8        | -788.5438526     | 3.7        |
| <b>8</b>    | -788.365181  | -26.1      | -788.582968      | -21.0      | -788.5834792     | -21.2      |
| <b>10</b>   | -788.370622  | -29.5      | -788.587722      | -24.0      | -788.5881072     | -24.1      |

(a) relative to **6** + **7**.

(b) single point energy calculations in DCM

(c) full geometrical optimizations in DCM

**Table S2.** Total (E, in a.u.) and relative energies ( $\Delta E$ ,<sup>a</sup> in kcal/mol) in gas phase and DCM of the stationary points involved in the I-DA reaction of oxonium cation **6** with styrene **12**.

|              | B3LYP/6-31G* |            | B3LYP/6-311G*    |            |
|--------------|--------------|------------|------------------|------------|
|              | Gas phase    |            | DCM <sup>b</sup> |            |
|              | E            | $\Delta E$ | E                | $\Delta E$ |
| <b>12</b>    | -309.648259  |            | -309.716427      |            |
| <b>TS21n</b> | -902.655865  | -7.0       | -902.895169      | 0.6        |
| <b>TS21x</b> | -902.656939  | -7.7       | -902.896383      | -0.1       |
| <b>IN1</b>   | -902.674805  | -18.9      | -902.911858      | -9.8       |
| <b>IN2</b>   | -902.674588  | -18.8      | -902.912694      | -10.4      |
| <b>TS22n</b> | -902.673201  | -17.9      | -902.910214      | -8.8       |
| <b>TS22x</b> | -902.672144  | -17.3      | -902.909612      | -8.4       |
| <b>13</b>    | -902.685334  | -25.5      | -902.926711      | -19.2      |
| <b>15</b>    | -902.687422  | -26.8      | -902.927814      | -19.9      |
| <b>TS3n</b>  | -902.629473  | 9.5        | -902.873936      | 14.0       |
| <b>TS3x</b>  | -902.634514  | 6.4        | -902.872043      | 15.1       |
| <b>17</b>    | -902.677141  | -20.4      | -902.921164      | -15.7      |
| <b>18</b>    | -902.685576  | -25.7      | -902.927686      | -19.8      |

(a) relative to **6** + **12**.

(b) single point energy calculations in DCM

**Table S3.** MPWB1K /6-311G\* total (E, in a.u.) and relative energies<sup>a</sup> ( $\Delta E$ , in kcal/mol) in DCM of the stereoisomeric TSs involved in the I-DA reaction of oxonium cation **6** with cyclopentene **7** and styrene **12**.

|              | E           | $\Delta E$ |
|--------------|-------------|------------|
| <b>TS1n</b>  | -788.119744 |            |
| <b>TS1x</b>  | -788.119424 | 0.2        |
| <b>TS21n</b> | -902.407140 |            |
| <b>TS21x</b> | -902.406449 | 0.4        |

(a) relative to **TS1n** and **TS21n**.

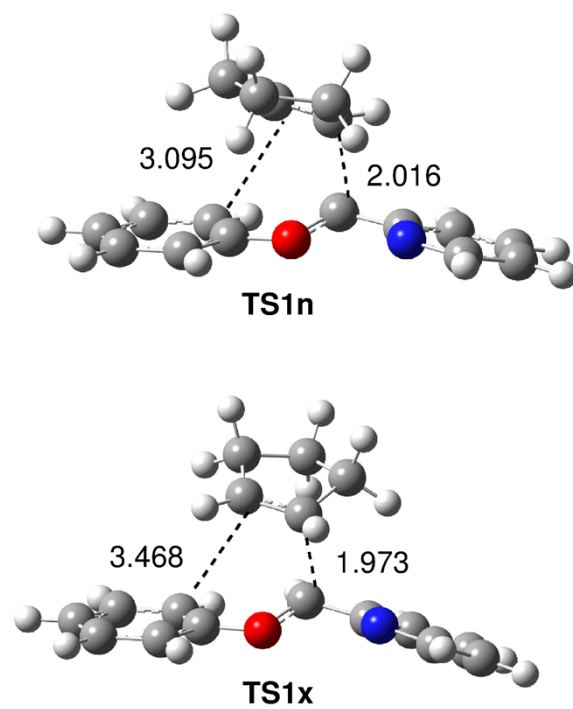

**Figure S1.** B3LYP(DCM)/6-311G\* transition state structures involved in the I-DA reactions between oxonium cation **6** and cyclopentene **7**. Lengths are given in Angstroms.

B3LYP/6-31G\* computed total energies, unique frequency imaginary, and cartesian coordinates of the stationary points involved in reaction of cationic aryl oxonium **6** with cyclopentene **7** and styrene **12**.

## 6

E (RB3LYP) = -592.996399 a.u.

|   |             |             |             |
|---|-------------|-------------|-------------|
| C | 2.41920400  | -1.17344600 | 0.01047600  |
| C | 1.81647200  | 0.08324100  | 0.00076800  |
| C | -0.48622000 | -0.61769000 | -0.00575100 |
| H | -0.19177800 | -1.66658000 | -0.01415800 |
| H | 1.85361900  | -2.09898300 | 0.02045700  |
| C | 2.53476000  | 1.27604700  | -0.00848900 |
| C | 3.92672800  | 1.20665600  | -0.00919500 |
| H | 4.50871200  | 2.12228500  | -0.01654000 |
| C | 4.56332800  | -0.03617100 | -0.00033900 |
| H | 5.64730300  | -0.08974800 | -0.00059900 |
| C | 3.81175200  | -1.21763500 | 0.00968900  |
| H | 2.00442600  | 2.22219200  | -0.01532900 |
| H | 4.31133700  | -2.18090000 | 0.01769500  |
| C | -1.87075100 | -0.26004200 | -0.00159200 |
| C | -2.82736600 | -1.29458100 | -0.00939600 |
| C | -4.17652300 | -0.94099500 | -0.00706400 |
| H | -2.52172100 | -2.33706700 | -0.01699300 |
| C | -3.46282900 | 1.37412300  | 0.01038300  |
| C | -4.49972600 | 0.41183700  | 0.00278900  |
| H | -4.94967200 | -1.70217600 | -0.01290700 |
| H | -3.70213200 | 2.43473200  | 0.01867000  |
| H | -5.53503900 | 0.73829900  | 0.00476600  |
| O | 0.41659600  | 0.28341200  | 0.00033600  |
| N | -2.17868400 | 1.06037000  | 0.00836900  |

## 7

E (RB3LYP) = -195.327139 a.u.

|   |             |             |             |
|---|-------------|-------------|-------------|
| C | 0.66756300  | 1.07609400  | -0.04571500 |
| C | 1.23682800  | -0.31767400 | 0.10073900  |
| C | 0.00013800  | -1.22755200 | -0.13208100 |
| C | -1.23674000 | -0.31797000 | 0.10069500  |
| C | -0.66782300 | 1.07594500  | -0.04557600 |
| H | 1.29294100  | 1.96336400  | -0.10188700 |
| H | 1.66408900  | -0.45624300 | 1.10599700  |
| H | 2.04862700  | -0.52651000 | -0.60782600 |

|   |             |             |             |
|---|-------------|-------------|-------------|
| H | 0.00029200  | -1.57877200 | -1.17013700 |
| H | 0.00018800  | -2.11432700 | 0.50945300  |
| H | -2.04845100 | -0.52679000 | -0.60798100 |
| H | -1.66406900 | -0.45683300 | 1.10588300  |
| H | -1.29341500 | 1.96305300  | -0.10188100 |

## TS1n

E(RB3LYP) = -788.324324 a.u.

1 imaginary frequency: -268.66 cm<sup>-1</sup>

|   |             |             |             |
|---|-------------|-------------|-------------|
| C | -2.12548700 | -1.13125900 | -1.04989600 |
| C | -1.52776700 | -0.98443000 | 0.20799600  |
| C | 0.64044600  | -0.40662600 | -0.57265900 |
| C | -1.01084000 | 1.64678700  | -1.28953700 |
| C | 0.32357900  | 1.54768500  | -0.89499400 |
| H | 0.39391800  | -0.73519000 | -1.57981400 |
| H | -1.53821900 | -1.20647900 | -1.95852000 |
| H | -1.38208600 | 1.36303800  | -2.27064800 |
| C | -2.28490800 | -1.00714900 | 1.38585000  |
| C | -3.66432900 | -1.13953100 | 1.29705700  |
| H | -4.26133000 | -1.15370900 | 2.20353300  |
| C | -4.28479500 | -1.25823700 | 0.04410000  |
| H | -5.36300900 | -1.36626600 | -0.01816900 |
| C | -3.51671000 | -1.26441600 | -1.11823100 |
| H | -1.77661600 | -0.91672800 | 2.34015000  |
| H | -3.99132200 | -1.38883700 | -2.08651500 |
| C | 2.08092300  | -0.48011100 | -0.22653000 |
| C | 3.01255800  | -0.74581900 | -1.23817000 |
| C | 4.35708300  | -0.85755500 | -0.88310400 |
| H | 2.69694300  | -0.88323600 | -2.26890800 |
| C | 3.70026100  | -0.41177700 | 1.38613900  |
| C | 4.70910400  | -0.69074600 | 0.45390400  |
| H | 5.10879200  | -1.07600100 | -1.63511900 |
| H | 3.94342800  | -0.26856600 | 2.43628100  |
| H | 5.74200800  | -0.77002800 | 0.77714300  |
| O | -0.16918900 | -0.81452500 | 0.40430800  |
| N | 2.41150900  | -0.30201200 | 1.06247100  |
| C | -1.84749000 | 2.36167800  | -0.28680400 |
| C | -0.93372900 | 2.48695300  | 0.95606400  |
| H | -2.06237200 | 3.35277800  | -0.72814800 |
| H | -2.82663700 | 1.90229800  | -0.11068700 |
| C | 0.50657600  | 2.32974300  | 0.40730600  |
| H | -1.07806000 | 3.43318100  | 1.48190200  |
| H | -1.15978200 | 1.68327600  | 1.66243900  |
| H | 1.09410300  | 1.55391900  | -1.66423900 |

|   |            |            |            |
|---|------------|------------|------------|
| H | 0.94935100 | 3.30421200 | 0.16468200 |
| H | 1.17698400 | 1.83148300 | 1.11193600 |

**TS1x**

E(RB3LYP) = -788.326419 a.u.  
 1 imaginary frequency : -218.51 cm<sup>-1</sup>

|   |             |             |             |
|---|-------------|-------------|-------------|
| C | 0.00000000  | 0.00000000  | 0.00000000  |
| C | 0.00000000  | 0.00000000  | 1.39850000  |
| C | 2.36076800  | 0.00000000  | 1.71956400  |
| C | 1.64754500  | 2.52256200  | 1.08223800  |
| C | 2.66416400  | 1.99163900  | 1.86558600  |
| H | 2.52875200  | -0.11947200 | 0.65218700  |
| H | 0.89064600  | -0.23456200 | -0.57297800 |
| C | -1.16872200 | 0.22049400  | 2.13440300  |
| C | -2.35612600 | 0.46603900  | 1.45274200  |
| H | -3.26921700 | 0.64037700  | 2.01306699  |
| C | -2.37513600 | 0.48396600  | 0.05258600  |
| H | -3.30566000 | 0.66918300  | -0.47458900 |
| C | -1.20309500 | 0.24766200  | -0.66650800 |
| H | -1.12314900 | 0.19647300  | 3.21817900  |
| H | -1.22096100 | 0.23863700  | -1.75192300 |
| C | 3.42630500  | -0.52552100 | 2.60861700  |
| C | 4.49911200  | -1.23472200 | 2.05812500  |
| C | 5.44432199  | -1.77846900 | 2.93279300  |
| H | 4.58254200  | -1.38370500 | 0.98553200  |
| C | 4.18100500  | -0.82799400 | 4.74460600  |
| C | 5.28186000  | -1.57646600 | 4.29922099  |
| H | 6.28561600  | -2.34662500 | 2.54843300  |
| H | 4.03676500  | -0.63567300 | 5.80510000  |
| H | 5.99325300  | -1.97540600 | 5.01506000  |
| O | 1.13108200  | -0.23483400 | 2.17095600  |
| N | 3.27165000  | -0.30667100 | 3.92367900  |
| C | 4.00110500  | 2.30691100  | 1.19331400  |
| C | 2.14977000  | 3.04616800  | -0.22033200 |
| H | 1.52288200  | 2.77389700  | -1.07712500 |
| H | 2.09907600  | 4.14787300  | -0.15854100 |
| C | 3.61686900  | 2.55496700  | -0.28516400 |
| H | 2.56246300  | 1.93408800  | 2.94799700  |
| H | 0.61705400  | 2.63212400  | 1.40500300  |
| H | 3.67111300  | 1.62144499  | -0.85779501 |
| H | 4.27763601  | 3.27059000  | -0.77885801 |
| H | 4.41298700  | 3.21433299  | 1.65314400  |
| H | 4.75186000  | 1.52197100  | 1.32143600  |

**TS1n (B3LYP/6-311G\* in DCM)**

E(RB3LYP) = -788.542245 a.u.

1 imaginary frequency: -289.15 cm<sup>-1</sup>

|   |             |             |             |
|---|-------------|-------------|-------------|
| C | -2.12857400 | -1.15792200 | -1.04556300 |
| C | -1.55093600 | -0.97349000 | 0.21106500  |
| C | 0.62059700  | -0.39844800 | -0.55792400 |
| C | -0.94491800 | 1.68967300  | -1.28872700 |
| C | 0.37623800  | 1.57799600  | -0.87406100 |
| H | 0.36795400  | -0.70859900 | -1.56479900 |
| H | -1.53357800 | -1.24642100 | -1.94523200 |
| H | -1.30254600 | 1.40360400  | -2.27157500 |
| C | -2.32167000 | -0.96881100 | 1.37557700  |
| C | -3.69707700 | -1.11486100 | 1.27428300  |
| H | -4.30386800 | -1.10556500 | 2.17231600  |
| C | -4.29877200 | -1.27145200 | 0.02062400  |
| H | -5.37411900 | -1.38540100 | -0.05356000 |
| C | -3.51519100 | -1.30169700 | -1.12800100 |
| H | -1.83033300 | -0.84549600 | 2.33318000  |
| H | -3.97377300 | -1.44889500 | -2.09891900 |
| C | 2.05984200  | -0.49412300 | -0.21552400 |
| C | 2.98284200  | -0.72244500 | -1.23998200 |
| C | 4.32607200  | -0.85344400 | -0.89965100 |
| H | 2.66009100  | -0.81117200 | -2.27158600 |
| C | 3.68894100  | -0.50369100 | 1.38518700  |
| C | 4.68826900  | -0.74292500 | 0.43769000  |
| H | 5.07017200  | -1.04180400 | -1.66467500 |
| H | 3.93971100  | -0.40794600 | 2.43729900  |
| H | 5.72155400  | -0.83670100 | 0.74971400  |
| O | -0.19172900 | -0.79278900 | 0.41880400  |
| N | 2.39976900  | -0.37774700 | 1.07562900  |
| C | -1.79061200 | 2.39658200  | -0.29536700 |
| C | -0.89670100 | 2.52038300  | 0.95959000  |
| H | -1.99941000 | 3.38583600  | -0.73786400 |
| H | -2.77161100 | 1.94115900  | -0.13808400 |
| C | 0.54818600  | 2.34710100  | 0.43287100  |
| H | -1.03947800 | 3.47041500  | 1.47391800  |
| H | -1.14082500 | 1.72843800  | 1.66932600  |
| H | 1.15744300  | 1.56844800  | -1.62805400 |
| H | 1.00628300  | 3.31470700  | 0.20311700  |
| H | 1.20257200  | 1.84137400  | 1.14310500  |

**TS1x (B3LYP/6-311G\* in DCM)**



E(RB3LYP) = -788.543936 a.u.  
1 imaginary frequency: -246.32 cm<sup>-1</sup>

|   |             |             |             |
|---|-------------|-------------|-------------|
| C | 2.34656100  | -0.31802400 | 1.13824300  |
| C | 1.76656300  | -1.03662400 | 0.09422200  |
| C | -0.44359200 | -0.17312800 | 0.30641700  |
| C | 0.93370800  | 1.72649500  | -0.98093000 |
| C | -0.39296700 | 1.33488400  | -1.04811000 |
| H | -0.16261800 | 0.37360300  | 1.19874500  |
| H | 1.75120500  | 0.20521800  | 1.87534200  |
| C | 2.53881400  | -1.76348300 | -0.81209900 |
| C | 3.92122300  | -1.75384100 | -0.67918000 |
| H | 4.52979300  | -2.31233300 | -1.38101700 |
| C | 4.52353900  | -1.02805500 | 0.35192100  |
| H | 5.60264100  | -1.02463600 | 0.45409200  |
| C | 3.73683700  | -0.31852100 | 1.25528600  |
| H | 2.04512800  | -2.31525600 | -1.60299800 |
| H | 4.19865600  | 0.23254600  | 2.06636900  |
| C | -1.86936500 | -0.57027700 | 0.21979300  |
| C | -2.73130500 | -0.25267200 | 1.27048400  |
| C | -4.05244800 | -0.69331200 | 1.19358800  |
| H | -2.37909600 | 0.30238300  | 2.13187800  |
| C | -3.51019300 | -1.66172200 | -0.93229600 |
| C | -4.44986900 | -1.41269900 | 0.07551100  |
| H | -4.75014600 | -0.47520600 | 1.99359500  |
| H | -3.79463800 | -2.20844000 | -1.82632200 |
| H | -5.46690700 | -1.77061300 | -0.03061700 |
| O | 0.39451500  | -1.11161700 | -0.12349200 |
| N | -2.24739300 | -1.25093100 | -0.87126500 |
| C | -1.25967000 | 2.48213000  | -0.53548500 |
| C | 1.10678800  | 3.02057700  | -0.27334400 |
| H | 1.93712800  | 3.02386500  | 0.43808300  |
| H | 1.38212300  | 3.75965200  | -1.04366400 |
| C | -0.28664300 | 3.32024300  | 0.32437500  |
| H | -0.73168400 | 0.66128200  | -1.82908000 |
| H | 1.75278200  | 1.19922000  | -1.45496400 |
| H | -0.32018100 | 2.99699300  | 1.36802200  |
| H | -0.52565700 | 4.38317300  | 0.31032300  |
| H | -1.61489100 | 3.05189300  | -1.40043800 |
| H | -2.14588800 | 2.15427600  | 0.00906300  |

**8**

E(RB3LYP) = -788.365181 a.u.

|   |            |            |            |
|---|------------|------------|------------|
| C | 0.00000000 | 0.00000000 | 0.00000000 |
|---|------------|------------|------------|

|   |             |             |             |
|---|-------------|-------------|-------------|
| C | 0.00000000  | 0.00000000  | 1.48810000  |
| C | 2.36913200  | 0.00000000  | 1.32098300  |
| C | 1.02622500  | 1.06691600  | -0.58958700 |
| C | 2.28045000  | 1.18654000  | 0.33923600  |
| H | 2.38536900  | -0.93736800 | 0.74937900  |
| H | 0.44106400  | -0.97628200 | -0.28147200 |
| H | 1.29445900  | 0.68923500  | -1.58005100 |
| C | -1.19195300 | 0.01825600  | 2.23781900  |
| C | -2.39136600 | 0.04160400  | 1.56226900  |
| H | -3.31330100 | 0.05578300  | 2.13789700  |
| C | -2.48163200 | 0.04705700  | 0.12842300  |
| H | -3.46134600 | 0.05980800  | -0.33727700 |
| C | -1.35193200 | 0.03334700  | -0.61888900 |
| H | -1.13563400 | 0.01913000  | 3.32080600  |
| H | -1.39681100 | 0.03048900  | -1.70467200 |
| C | 3.53202800  | -0.00450000 | 2.28975100  |
| C | 4.61820500  | -0.85225500 | 2.06298800  |
| C | 5.69028600  | -0.81047200 | 2.95595100  |
| H | 4.62908900  | -1.53291100 | 1.21600000  |
| C | 4.48633800  | 0.85915100  | 4.18411700  |
| C | 5.62371500  | 0.05992600  | 4.04073500  |
| H | 6.55262700  | -1.45391200 | 2.80996800  |
| H | 4.39495100  | 1.54713400  | 5.02146100  |
| H | 6.42944600  | 0.12048700  | 4.76511900  |
| O | 1.13295300  | -0.03879500 | 2.12389900  |
| N | 3.46000000  | 0.83905200  | 3.32766400  |
| C | 0.45483800  | 2.49936300  | -0.66960900 |
| C | 0.78036700  | 3.13034600  | 0.69049600  |
| H | 0.99778500  | 3.03117900  | -1.46050300 |
| H | -0.60674500 | 2.53025000  | -0.93410100 |
| C | 2.18629500  | 2.59272300  | 1.01440100  |
| H | 0.74555200  | 4.22306800  | 0.66363800  |
| H | 0.05334300  | 2.81243400  | 1.44957900  |
| H | 3.18588600  | 1.11747700  | -0.27227400 |
| H | 2.94486800  | 3.24509700  | 0.57023600  |
| H | 2.38901800  | 2.54182100  | 2.08562600  |

**9-endo**

E(RB3LYP) = -788.019899 a.u.

|   |             |             |             |
|---|-------------|-------------|-------------|
| C | 2.12210600  | 0.01016200  | 0.47007400  |
| C | 1.43235700  | -1.05067100 | -0.13987400 |
| C | -0.64655000 | -0.20404100 | 0.60079700  |
| C | 1.39438400  | 1.26264200  | 0.94098500  |
| C | -0.10776600 | 1.23442600  | 0.54331600  |

|   |             |             |             |
|---|-------------|-------------|-------------|
| H | -0.48043100 | -0.57942600 | 1.62346200  |
| H | 1.50542900  | 1.34749000  | 2.03056200  |
| C | 2.11387600  | -2.17277600 | -0.62761300 |
| C | 3.49468600  | -2.25996400 | -0.49173000 |
| H | 4.01854500  | -3.13423300 | -0.86905400 |
| C | 4.20055600  | -1.23272000 | 0.14266000  |
| H | 5.27764000  | -1.30060800 | 0.26708000  |
| C | 3.51193000  | -0.11680000 | 0.61151300  |
| H | 1.53573300  | -2.96120500 | -1.09965400 |
| H | 4.06290200  | 0.68577100  | 1.09757400  |
| C | -2.12727800 | -0.33349800 | 0.29292200  |
| C | -3.04376600 | -0.49852500 | 1.33844500  |
| C | -4.40312300 | -0.57933000 | 1.04186600  |
| H | -2.69413900 | -0.56948200 | 2.36482000  |
| C | -3.81330500 | -0.34474500 | -1.26352000 |
| C | -4.80202400 | -0.50364900 | -0.29090600 |
| H | -5.13383700 | -0.70872100 | 1.83586200  |
| H | -4.08333000 | -0.28404600 | -2.31689800 |
| H | -5.84825500 | -0.56849300 | -0.57447600 |
| O | 0.07029400  | -1.05298500 | -0.30076400 |
| N | -2.50807700 | -0.25603100 | -0.99056400 |
| C | 1.90238200  | 2.54519500  | 0.24187500  |
| C | 1.21154600  | 2.51125400  | -1.13116700 |
| H | 1.56469800  | 3.41894800  | 0.81600500  |
| H | 2.99396000  | 2.59716100  | 0.17693700  |
| C | -0.19610800 | 1.92793000  | -0.85179900 |
| H | 1.17521400  | 3.49644900  | -1.60825200 |
| H | 1.76747600  | 1.84743900  | -1.80315000 |
| H | -0.67013700 | 1.82049600  | 1.28082800  |
| H | -0.95360600 | 2.71851800  | -0.82540300 |
| H | -0.50708300 | 1.22069300  | -1.62322400 |

## 10

E(RB3LYP) = -788.370622 a.u.

|   |             |             |             |
|---|-------------|-------------|-------------|
| C | 2.13233000  | 0.06645600  | 0.35345300  |
| C | 1.40011900  | -1.21953800 | 0.19709500  |
| C | -0.60981700 | 0.06962900  | 0.38707400  |
| C | 1.51179000  | 1.13766000  | -0.64260300 |
| C | -0.05131800 | 1.06940300  | -0.63710700 |
| H | -0.41468600 | 0.39590500  | 1.41558900  |
| H | 1.90102200  | 0.44520700  | 1.36629000  |
| C | 2.06458100  | -2.44065800 | -0.02763700 |
| C | 3.43851300  | -2.43719000 | -0.10818500 |
| H | 3.95315700  | -3.37741800 | -0.28887900 |

|   |             |             |             |
|---|-------------|-------------|-------------|
| C | 4.22362000  | -1.24235700 | 0.02661200  |
| H | 5.30354100  | -1.31009800 | -0.05071600 |
| C | 3.61249100  | -0.05428500 | 0.24851200  |
| H | 1.47925700  | -3.34582900 | -0.14580600 |
| H | 4.19221400  | 0.85702500  | 0.35836600  |
| C | -2.07584400 | -0.24985400 | 0.20432100  |
| C | -2.96260500 | -0.21801600 | 1.28068200  |
| C | -4.30389000 | -0.52835500 | 1.04302000  |
| H | -2.61936400 | 0.03959700  | 2.27874400  |
| C | -3.72339800 | -0.87103000 | -1.25963400 |
| C | -4.69246800 | -0.86420500 | -0.25061200 |
| H | -5.02525500 | -0.51007800 | 1.85433400  |
| H | -3.99098400 | -1.12788000 | -2.28209500 |
| H | -5.72286800 | -1.11426400 | -0.48193000 |
| O | 0.10254600  | -1.22675500 | 0.24021600  |
| N | -2.44093400 | -0.56641300 | -1.04613400 |
| C | -0.52223900 | 2.51148000  | -0.30535500 |
| C | 1.88230300  | 2.59283400  | -0.24924500 |
| H | 2.79767900  | 2.66462300  | 0.34753600  |
| H | 2.05941100  | 3.16773300  | -1.16503300 |
| C | 0.64243600  | 3.13652800  | 0.47684300  |
| H | -0.42670000 | 0.73642400  | -1.60770700 |
| H | 1.89665900  | 0.88510700  | -1.63371900 |
| H | 0.62964300  | 2.80550000  | 1.52464600  |
| H | 0.60912000  | 4.22950700  | 0.49042600  |
| H | -0.68307100 | 3.05844500  | -1.24050000 |
| H | -1.47222900 | 2.52840500  | 0.23825600  |

### 11-exo

E(RB3LYP) = -788.023448 a.u.

|   |             |             |             |
|---|-------------|-------------|-------------|
| C | 2.21902800  | 0.04574900  | -0.20389200 |
| C | 1.52680800  | -1.16548900 | -0.05228600 |
| C | -0.53344600 | -0.02364800 | 0.28306600  |
| C | 1.47061700  | 1.33834100  | -0.44421100 |
| C | -0.06692700 | 1.15671600  | -0.57601600 |
| H | -0.31442200 | 0.19080500  | 1.34138500  |
| C | 2.21348600  | -2.37692900 | 0.09573300  |
| C | 3.60408300  | -2.38846300 | 0.10640200  |
| H | 4.13306900  | -3.33074000 | 0.22277900  |
| C | 4.31581800  | -1.19164800 | -0.02640100 |
| H | 5.40213100  | -1.19400000 | -0.01598500 |
| C | 3.62047400  | 0.00465000  | -0.18427100 |
| H | 1.63496100  | -3.28955000 | 0.20176100  |
| H | 4.17122300  | 0.93477100  | -0.30990900 |

|   |             |             |             |
|---|-------------|-------------|-------------|
| C | -2.01404000 | -0.33437100 | 0.14466600  |
| C | -2.78233400 | -0.65520200 | 1.26833300  |
| C | -4.13102400 | -0.96580800 | 1.10001900  |
| H | -2.32624200 | -0.66570000 | 2.25420400  |
| C | -3.81781900 | -0.61417400 | -1.24617400 |
| C | -4.66430700 | -0.94808400 | -0.18685500 |
| H | -4.75084300 | -1.21786400 | 1.95636000  |
| H | -4.19820500 | -0.58595700 | -2.26627800 |
| H | -5.70853700 | -1.18274100 | -0.37072100 |
| O | 0.15785800  | -1.23596800 | -0.06608200 |
| N | -2.52545400 | -0.31097500 | -1.09531000 |
| C | -0.68966700 | 2.50243500  | -0.09506100 |
| C | 1.62926100  | 2.43445700  | 0.63514700  |
| H | 1.47571200  | 2.00176700  | 1.63293400  |
| H | 2.62316700  | 2.89511200  | 0.63112400  |
| C | 0.49898800  | 3.41469200  | 0.29082200  |
| H | -0.34992900 | 0.92814800  | -1.60643600 |
| H | 1.83470800  | 1.76686100  | -1.38952400 |
| H | 0.25725200  | 4.09983100  | 1.11055600  |
| H | 0.79706800  | 4.03127400  | -0.56708500 |
| H | -1.32761400 | 2.95121000  | -0.86215200 |
| H | -1.33219300 | 2.33201100  | 0.77868500  |

## 12

E (RB3LYP) = -309.648259 a.u.

|   |             |             |             |
|---|-------------|-------------|-------------|
| C | -1.78074200 | -1.04649400 | 0.00055200  |
| C | -0.40627500 | -1.28103600 | 0.00004900  |
| C | 0.51526900  | -0.22003000 | -0.00055200 |
| C | 0.00867400  | 1.09268900  | -0.00074900 |
| C | -1.36253400 | 1.32947700  | -0.00023800 |
| C | -2.26539200 | 0.26154100  | 0.00041900  |
| H | -2.47165500 | -1.88545800 | 0.00106200  |
| H | -0.03465600 | -2.30345900 | 0.00012200  |
| H | 0.69363700  | 1.93569200  | -0.00143000 |
| H | -1.73079900 | 2.35216100  | -0.00042700 |
| H | -3.33554000 | 0.45010300  | 0.00077400  |
| C | 1.95467000  | -0.52914700 | -0.00089400 |
| C | 2.97758800  | 0.33471000  | 0.00119400  |
| H | 2.18560100  | -1.59466200 | -0.00296600 |
| H | 4.00457100  | -0.01747600 | 0.00062400  |
| H | 2.84129400  | 1.41283900  | 0.00355700  |

## TS21n

E(RB3LYP) = -902.655865 a.u.

1 imaginary frequency: -101.32 cm<sup>-1</sup>

|   |             |             |             |
|---|-------------|-------------|-------------|
| C | 1.19815300  | -2.34807000 | 0.70475400  |
| C | 0.80608200  | -1.62022100 | -0.41825400 |
| C | -1.33961500 | -0.95113600 | 0.39057100  |
| C | 0.58350000  | 0.78731400  | 1.89911100  |
| C | -0.78416200 | 0.72924300  | 1.96596200  |
| H | -1.27595600 | -1.69282100 | 1.18033400  |
| H | 0.57953800  | -2.43107400 | 1.59115000  |
| H | 1.15263400  | 0.20791300  | 2.62547800  |
| H | -1.26087400 | 0.23348500  | 2.80641800  |
| H | -1.39517100 | 1.43733900  | 1.41893400  |
| C | 1.60349000  | -1.51947100 | -1.55745700 |
| C | 2.83345100  | -2.17005100 | -1.57209900 |
| H | 3.46304300  | -2.10464700 | -2.45369500 |
| C | 3.25285300  | -2.90550900 | -0.45886700 |
| H | 4.21156800  | -3.41417800 | -0.47351300 |
| C | 2.43752200  | -2.99120300 | 0.67092400  |
| H | 1.24941400  | -0.94074600 | -2.40366300 |
| H | 2.75983600  | -3.56499400 | 1.53416700  |
| C | -2.64734800 | -0.40554800 | 0.04084400  |
| C | -3.77612400 | -0.85083300 | 0.74471400  |
| C | -5.02552200 | -0.36150200 | 0.36242800  |
| H | -3.68250000 | -1.56990500 | 1.55355100  |
| C | -3.89507100 | 0.94840900  | -1.31237800 |
| C | -5.08884900 | 0.55237200  | -0.68539400 |
| H | -5.92553600 | -0.68965800 | 0.87270400  |
| H | -3.91540500 | 1.67016500  | -2.12558800 |
| H | -6.03744300 | 0.96277900  | -1.01614200 |
| O | -0.41809300 | -0.93951000 | -0.52687300 |
| N | -2.69624200 | 0.48932600  | -0.96536300 |
| C | 1.37519300  | 1.54272600  | 0.95386300  |
| C | 2.77250700  | 1.61682600  | 1.15387900  |
| C | 0.81016600  | 2.21063600  | -0.15866300 |
| C | 3.57591200  | 2.35034400  | 0.29043600  |
| H | 3.21554300  | 1.10214800  | 2.00263900  |
| C | 1.62042400  | 2.92995900  | -1.02666800 |
| H | -0.25534300 | 2.14337600  | -0.35592300 |
| C | 3.00087500  | 3.00808800  | -0.80196700 |
| H | 4.64608900  | 2.41096400  | 0.46240700  |
| H | 1.18121700  | 3.43617300  | -1.88095500 |
| H | 3.62715600  | 3.58023400  | -1.48022600 |

**TS21x**

E(RB3LYP) = -902.656939 a.u.

1 imaginary frequency: -105.14 cm<sup>-1</sup>

|   |             |             |             |
|---|-------------|-------------|-------------|
| C | -0.98939300 | 1.99113000  | 1.32508300  |
| C | -0.21551400 | 2.22908600  | 0.19091800  |
| C | 1.23106300  | 0.35242000  | 0.29337800  |
| C | -0.92093800 | -0.64593800 | -1.36643800 |
| C | 0.42975900  | -0.80280200 | -1.54442200 |
| H | 0.51535300  | -0.14603500 | 0.94145400  |
| H | -0.65424500 | 1.32118700  | 2.11068000  |
| H | -1.36572900 | 0.28165000  | -1.72343300 |
| H | 0.92322600  | -1.74352800 | -1.32118600 |
| H | 0.97696200  | -0.12030100 | -2.18662200 |
| C | -0.58498800 | 3.14777000  | -0.78942600 |
| C | -1.79546900 | 3.82405200  | -0.64296900 |
| H | -2.10214500 | 4.54110100  | -1.39787500 |
| C | -2.60248300 | 3.58802400  | 0.47391300  |
| H | -3.53865400 | 4.12529400  | 0.58895600  |
| C | -2.19617800 | 2.68032900  | 1.45532700  |
| H | 0.06873300  | 3.31915400  | -1.63824900 |
| H | -2.80841500 | 2.51861000  | 2.33698600  |
| C | 2.60725000  | -0.13551600 | 0.24007700  |
| C | 2.96203400  | -1.25843900 | 1.00306000  |
| C | 4.29127500  | -1.68050500 | 0.97139800  |
| H | 2.22626300  | -1.77410100 | 1.61397400  |
| C | 4.73043500  | 0.12752000  | -0.55907300 |
| C | 5.19283800  | -0.97643400 | 0.17804400  |
| H | 4.61232600  | -2.53709100 | 1.55559000  |
| H | 5.41190700  | 0.68981000  | -1.19317200 |
| H | 6.23637800  | -1.26890400 | 0.12006000  |
| O | 1.02533200  | 1.60308700  | -0.01689600 |
| N | 3.46900900  | 0.54631500  | -0.53778200 |
| C | -1.84136500 | -1.55969600 | -0.72055000 |
| C | -3.17481200 | -1.13904100 | -0.51813300 |
| C | -1.47078300 | -2.85740900 | -0.29830900 |
| C | -4.10194000 | -1.97771600 | 0.08990800  |
| H | -3.47259700 | -0.14577400 | -0.84385700 |
| C | -2.39903500 | -3.69218000 | 0.30859100  |
| H | -0.46163200 | -3.21980500 | -0.46995600 |
| C | -3.71552900 | -3.25503100 | 0.50550100  |
| H | -5.12410400 | -1.64262200 | 0.23626700  |
| H | -2.10730100 | -4.69044900 | 0.62018800  |
| H | -4.43941900 | -3.91483900 | 0.97457700  |

# INI

E(RB3LYP) = -902.674805 a.u.

|   |             |             |             |
|---|-------------|-------------|-------------|
| C | 1.16572200  | -2.23103200 | 0.64177400  |
| C | 0.67727400  | -1.54614500 | -0.48790400 |
| C | -1.31111500 | -0.84898000 | 0.63812300  |
| C | 0.83147500  | 0.28513800  | 1.66152200  |
| C | -0.63440800 | 0.10135400  | 1.72660700  |
| H | -1.42211600 | -1.84495400 | 1.07729800  |
| H | 0.53259700  | -2.43487100 | 1.49740300  |
| H | 1.43931000  | -0.21573700 | 2.41019800  |
| H | -0.91020700 | -0.29822400 | 2.70659600  |
| H | -1.12337200 | 1.07064900  | 1.58815200  |
| C | 1.47534200  | -1.41887100 | -1.63846200 |
| C | 2.75376000  | -1.94851300 | -1.64447800 |
| H | 3.36975200  | -1.84810400 | -2.53318800 |
| C | 3.26235300  | -2.61769500 | -0.51261500 |
| H | 4.26459300  | -3.03365500 | -0.53342100 |
| C | 2.46606800  | -2.76521200 | 0.61251300  |
| H | 1.06955100  | -0.89379400 | -2.49673800 |
| H | 2.83277100  | -3.30948700 | 1.47768500  |
| C | -2.67360100 | -0.31385800 | 0.23323000  |
| C | -3.76121300 | -1.17366100 | 0.08242200  |
| C | -4.97993000 | -0.63600400 | -0.33646400 |
| H | -3.66046500 | -2.23621900 | 0.28277200  |
| C | -3.91312900 | 1.50952600  | -0.40629000 |
| C | -5.05882500 | 0.73124400  | -0.58849700 |
| H | -5.84874100 | -1.27528300 | -0.46079000 |
| H | -3.93641700 | 2.58177600  | -0.58598500 |
| H | -5.98607500 | 1.19264600  | -0.91221300 |
| O | -0.54169000 | -0.94178600 | -0.54982800 |
| N | -2.74386100 | 1.00347100  | -0.00108000 |
| C | 1.49360200  | 1.22220900  | 0.84274600  |
| C | 2.90183200  | 1.39293600  | 0.99671500  |
| C | 0.79783200  | 2.01414800  | -0.12033800 |
| C | 3.58382400  | 2.31882700  | 0.22876500  |
| H | 3.43056100  | 0.78845000  | 1.72836800  |
| C | 1.49582900  | 2.93167400  | -0.88556100 |
| H | -0.27399200 | 1.89539500  | -0.25076900 |
| C | 2.88077200  | 3.08659800  | -0.71226500 |
| H | 4.65334300  | 2.45408200  | 0.35220000  |
| H | 0.97262300  | 3.53915900  | -1.61702500 |
| H | 3.41605900  | 3.81607500  | -1.31360200 |



## IN2

E (RB3LYP) = -902.674588 a.u.

|   |             |             |             |
|---|-------------|-------------|-------------|
| C | -0.83322700 | 1.70337000  | 1.03138500  |
| C | 0.09255300  | 1.94859600  | 0.00191100  |
| C | 1.39640800  | -0.01566800 | 0.48327900  |
| C | -0.88518600 | -0.72442600 | -0.51098900 |
| C | 0.40475900  | -1.14626500 | 0.02228700  |
| H | 1.24396300  | 0.16588700  | 1.55287300  |
| H | -0.66432700 | 0.93317600  | 1.77487200  |
| H | -0.84632900 | 0.01409700  | -1.30748200 |
| H | 0.32983600  | -1.89554600 | 0.81391500  |
| H | 0.96584300  | -1.61023700 | -0.82141300 |
| C | -0.10878500 | 3.01260000  | -0.89486800 |
| C | -1.23017900 | 3.81691300  | -0.76225200 |
| H | -1.38119700 | 4.64067700  | -1.45349700 |
| C | -2.16739000 | 3.57593500  | 0.25761400  |
| H | -3.03865700 | 4.21549200  | 0.35734000  |
| C | -1.96173400 | 2.52840700  | 1.14665400  |
| H | 0.62633500  | 3.18128700  | -1.67506600 |
| H | -2.66778300 | 2.34693800  | 1.95152700  |
| C | 2.83535800  | -0.44995300 | 0.23860300  |
| C | 3.87972200  | 0.10792800  | 0.97865900  |
| C | 5.18447700  | -0.28500600 | 0.68208700  |
| H | 3.67781900  | 0.83480400  | 1.75976500  |
| C | 4.28503900  | -1.71914400 | -1.01582500 |
| C | 5.39397800  | -1.21545200 | -0.33524800 |
| H | 6.02172500  | 0.12730600  | 1.23711300  |
| H | 4.40121500  | -2.44947100 | -1.81275700 |
| H | 6.39260200  | -1.55067900 | -0.59572600 |
| O | 1.20727900  | 1.19248500  | -0.23682500 |
| N | 3.03230700  | -1.34406000 | -0.73395600 |
| C | -2.15590600 | -1.28839700 | -0.25995900 |
| C | -3.26205200 | -0.81226300 | -1.02315700 |
| C | -2.37841200 | -2.31804200 | 0.69958000  |
| C | -4.52646900 | -1.34515700 | -0.84107300 |
| H | -3.09887100 | -0.02278600 | -1.75130900 |
| C | -3.64574900 | -2.84282500 | 0.87523400  |
| H | -1.55372600 | -2.69909700 | 1.29191500  |
| C | -4.71814100 | -2.35974900 | 0.10687600  |
| H | -5.36401600 | -0.98199900 | -1.42755900 |
| H | -3.81359700 | -3.62979300 | 1.60329700  |
| H | -5.70960800 | -2.77993100 | 0.24970900  |

## TS22n

E(RB3LYP) = -902.673201 a.u.

1 imaginary frequency: -170.32 cm<sup>-1</sup>

|   |             |             |             |
|---|-------------|-------------|-------------|
| C | -1.08216800 | -2.01945800 | -0.62918400 |
| C | -0.51905800 | -1.53602100 | 0.58612300  |
| C | 1.43819800  | -0.87406500 | -0.58664800 |
| C | -0.87686000 | -0.01962300 | -1.51511600 |
| C | 0.62706900  | 0.02038100  | -1.58953200 |
| H | 1.59361900  | -1.86645900 | -1.02281700 |
| H | -0.43410100 | -2.38822800 | -1.41654700 |
| H | -1.38098900 | -0.41105600 | -2.39401600 |
| H | 0.94036200  | -0.27480100 | -2.59594300 |
| H | 0.96150200  | 1.04589000  | -1.41557700 |
| C | -1.30585900 | -1.44132900 | 1.74774900  |
| C | -2.63247700 | -1.81960800 | 1.69256400  |
| H | -3.24588700 | -1.73249000 | 2.58473500  |
| C | -3.21430300 | -2.32035500 | 0.49710600  |
| H | -4.25455900 | -2.62871700 | 0.49509400  |
| C | -2.44143000 | -2.45252500 | -0.63046900 |
| H | -0.85779100 | -1.04405300 | 2.65193200  |
| H | -2.85140500 | -2.88575100 | -1.53801100 |
| C | 2.77424600  | -0.25322600 | -0.23130000 |
| C | 3.94575200  | -1.00892200 | -0.23488900 |
| C | 5.13979100  | -0.38336500 | 0.13154900  |
| H | 3.92935400  | -2.05868200 | -0.51300700 |
| C | 3.88192300  | 1.63190500  | 0.46047900  |
| C | 5.10845000  | 0.96167800  | 0.48907100  |
| H | 6.07268500  | -0.93891900 | 0.13704400  |
| H | 3.81915900  | 2.68396300  | 0.72860700  |
| H | 6.01142700  | 1.48884000  | 0.77957300  |
| O | 0.71929000  | -1.03499800 | 0.65023200  |
| N | 2.73615500  | 1.04426100  | 0.10440800  |
| C | -1.64102600 | 0.95730800  | -0.77566100 |
| C | -3.02098200 | 1.10039500  | -1.05803900 |
| C | -1.04657000 | 1.80593200  | 0.19183500  |
| C | -3.77867200 | 2.06889300  | -0.41231300 |
| H | -3.48353700 | 0.45397600  | -1.79919900 |
| C | -1.81266700 | 2.76812500  | 0.83426300  |
| H | 0.01112100  | 1.71652400  | 0.42279900  |
| C | -3.17501600 | 2.90347500  | 0.53396000  |
| H | -4.83247300 | 2.18145800  | -0.64667300 |
| H | -1.35153300 | 3.42522800  | 1.56508200  |
| H | -3.76441400 | 3.66587600  | 1.03492600  |

**TS22x**

E(RB3LYP) = -902.672144 a.u.

1 imaginary frequency: -165.08 cm<sup>-1</sup>

|   |             |             |             |
|---|-------------|-------------|-------------|
| C | 0.94983500  | 1.35145300  | -0.89583600 |
| C | -0.11817800 | 1.94781300  | -0.16798300 |
| C | -1.44051700 | -0.00207000 | -0.48493300 |
| C | 0.94303500  | -0.38697500 | 0.53004000  |
| C | -0.41619900 | -0.93375800 | 0.23148800  |
| H | -1.25284300 | -0.01453900 | -1.56457200 |
| H | 0.73976100  | 0.61902400  | -1.66685600 |
| H | 0.98907800  | 0.28616200  | 1.38140000  |
| H | -0.36018900 | -1.85612000 | -0.35113500 |
| H | -0.88711300 | -1.17534400 | 1.19601700  |
| C | 0.07755800  | 3.15634700  | 0.52742900  |
| C | 1.31641200  | 3.76627300  | 0.48215300  |
| H | 1.46962600  | 4.69702300  | 1.02052400  |
| C | 2.39389100  | 3.19582500  | -0.24294700 |
| H | 3.35331700  | 3.70216600  | -0.26664800 |
| C | 2.20512200  | 2.02165200  | -0.93429300 |
| H | -0.74920100 | 3.57267200  | 1.09267200  |
| H | 3.00907900  | 1.58951300  | -1.52184700 |
| C | -2.87077700 | -0.42654800 | -0.21133300 |
| C | -3.84292500 | -0.34741300 | -1.20895400 |
| C | -5.15182000 | -0.71261500 | -0.88920700 |
| H | -3.58799900 | -0.00527700 | -2.20795500 |
| C | -4.38556500 | -1.18498900 | 1.33384500  |
| C | -5.43084200 | -1.13729200 | 0.40748500  |
| H | -5.93509100 | -0.66568300 | -1.63970400 |
| H | -4.56245900 | -1.51668100 | 2.35430800  |
| H | -6.43328600 | -1.43247900 | 0.70011200  |
| O | -1.30806400 | 1.35096300  | -0.01719500 |
| N | -3.12951600 | -0.84030300 | 1.03546900  |
| C | 2.17127100  | -1.10242600 | 0.27681300  |
| C | 3.30894700  | -0.77807600 | 1.05516400  |
| C | 2.28347900  | -2.12319800 | -0.69739100 |
| C | 4.50457300  | -1.46184000 | 0.88263000  |
| H | 3.23518500  | 0.00744800  | 1.80244400  |
| C | 3.48416000  | -2.79605800 | -0.87362600 |
| H | 1.43231000  | -2.38708800 | -1.31704100 |
| C | 4.59434500  | -2.47045700 | -0.08326500 |
| H | 5.36555500  | -1.21558900 | 1.49595200  |
| H | 3.56127000  | -3.57910600 | -1.62127800 |
| H | 5.52929500  | -3.00557400 | -0.22079200 |

## 13

E(RB3LYP) = -902.685334 a.u.

|   |             |             |             |
|---|-------------|-------------|-------------|
| C | 0.98753800  | 1.34548800  | -0.92870400 |
| C | 0.14859300  | 1.71916100  | 0.23958200  |
| C | -1.56165700 | 0.36841400  | -0.75374700 |
| C | 0.90970100  | -0.22846800 | -1.22096600 |
| C | -0.52131800 | -0.74084300 | -0.91486400 |
| H | -1.65867400 | 0.97890000  | -1.65957900 |
| H | 0.48424500  | 1.80269500  | -1.80181000 |
| H | 1.10068900  | -0.31183400 | -2.29472600 |
| H | -0.85702300 | -1.40754800 | -1.71524300 |
| H | -0.54026300 | -1.32225400 | 0.01001700  |
| C | 0.63509100  | 2.53322700  | 1.27913000  |
| C | 1.93093400  | 2.99432500  | 1.19956200  |
| H | 2.30933500  | 3.62276000  | 2.00176000  |
| C | 2.80773200  | 2.68101800  | 0.10738000  |
| H | 3.81675400  | 3.07900300  | 0.11039800  |
| C | 2.37063900  | 1.89055000  | -0.90183900 |
| H | -0.01540100 | 2.77357600  | 2.11281400  |
| H | 3.01887400  | 1.63327200  | -1.73428000 |
| C | -2.91481800 | -0.12256400 | -0.29730900 |
| C | -4.08281900 | 0.26337900  | -0.95448100 |
| C | -5.30097800 | -0.23200800 | -0.48322700 |
| H | -4.04700000 | 0.93178300  | -1.81013300 |
| C | -4.06826400 | -1.39932300 | 1.21254900  |
| C | -5.29520600 | -1.07732200 | 0.62259200  |
| H | -6.23197300 | 0.04174000  | -0.97028100 |
| H | -4.02602700 | -2.05787500 | 2.07713800  |
| H | -6.21739000 | -1.48450300 | 1.02452400  |
| O | -1.07915200 | 1.29427500  | 0.30516000  |
| N | -2.89688600 | -0.94015700 | 0.76511800  |
| C | 1.99571800  | -1.00383000 | -0.49223100 |
| C | 3.03793000  | -1.58257600 | -1.22641300 |
| C | 1.98465100  | -1.15761000 | 0.90252600  |
| C | 4.05161700  | -2.29765900 | -0.58467100 |
| H | 3.05481700  | -1.48589800 | -2.30996900 |
| C | 2.99900400  | -1.86634700 | 1.54421800  |
| H | 1.17713800  | -0.73715600 | 1.49831400  |
| C | 4.03570500  | -2.43823100 | 0.80228600  |
| H | 4.84742900  | -2.74656000 | -1.17171400 |
| H | 2.97569800  | -1.98017700 | 2.62420800  |
| H | 4.82143600  | -2.99571100 | 1.30321800  |

## 14-endo

E(RB3LYP) = -902.341689 a.u.

|   |             |             |             |
|---|-------------|-------------|-------------|
| C | 1.09634100  | 1.29750800  | -0.34137800 |
| C | -0.07039700 | 1.98077800  | 0.04214000  |
| C | -1.46931100 | 0.16222200  | -0.65265100 |
| C | 1.02818500  | -0.16069700 | -0.78900200 |
| C | -0.31148600 | -0.78183700 | -0.34102000 |
| H | -1.48269100 | 0.38683600  | -1.73071700 |
| H | 1.04213900  | -0.17386400 | -1.88948800 |
| H | -0.46771300 | -1.74209000 | -0.84545800 |
| H | -0.31341200 | -0.97727700 | 0.73555500  |
| C | -0.01656100 | 3.31746400  | 0.45796100  |
| C | 1.19843700  | 3.99263300  | 0.47817700  |
| H | 1.23112200  | 5.03019900  | 0.80017400  |
| C | 2.36838100  | 3.33888400  | 0.07995800  |
| H | 3.32116500  | 3.86052600  | 0.08779200  |
| C | 2.30562400  | 2.00651500  | -0.32004300 |
| H | -0.94222000 | 3.80081800  | 0.75498400  |
| H | 3.21539000  | 1.48880100  | -0.61234200 |
| C | -2.82314300 | -0.39322100 | -0.25160700 |
| C | -3.90930900 | -0.33469000 | -1.12959500 |
| C | -5.13906600 | -0.84802700 | -0.71816000 |
| H | -3.79178200 | 0.10982200  | -2.11382100 |
| C | -4.09724600 | -1.41203500 | 1.36129000  |
| C | -5.23945500 | -1.39887800 | 0.55702800  |
| H | -6.00022000 | -0.81532800 | -1.38023300 |
| H | -4.13529200 | -1.83618300 | 2.36363600  |
| H | -6.17475300 | -1.81086900 | 0.92407100  |
| O | -1.31526800 | 1.40631500  | 0.05340800  |
| N | -2.91413900 | -0.92662400 | 0.97626800  |
| C | 2.20375400  | -1.01033400 | -0.32339800 |
| C | 2.94866200  | -1.75567300 | -1.24439600 |
| C | 2.54166200  | -1.10001300 | 1.03555400  |
| C | 4.00106000  | -2.57365700 | -0.82551500 |
| H | 2.70241300  | -1.69564200 | -2.30265000 |
| C | 3.59030300  | -1.91507500 | 1.45787900  |
| H | 1.98400200  | -0.51782000 | 1.76474400  |
| C | 4.32445800  | -2.65670100 | 0.52817200  |
| H | 4.56723600  | -3.14227800 | -1.55884400 |
| H | 3.83707300  | -1.97022100 | 2.51508100  |
| H | 5.14331600  | -3.29057300 | 0.85800800  |

## 15

E(RB3LYP) = -902.687422 a.u

|   |             |             |             |
|---|-------------|-------------|-------------|
| C | 1.08302800  | 1.20719300  | -0.42171700 |
| C | -0.15802900 | 2.00430900  | -0.23521800 |
| C | -1.33078300 | -0.07336600 | -0.38673500 |
| C | 1.07209300  | -0.02620200 | 0.60340800  |
| C | -0.34063300 | -0.67734600 | 0.61186800  |
| H | -1.03098800 | -0.26365700 | -1.42363400 |
| H | 1.02439300  | 0.73605400  | -1.41882500 |
| H | 1.25213800  | 0.41610800  | 1.58703500  |
| H | -0.26403100 | -1.74491600 | 0.38686900  |
| H | -0.79622400 | -0.58655300 | 1.60120700  |
| C | -0.12856600 | 3.39522400  | -0.02339000 |
| C | 1.09264400  | 4.03187600  | 0.00096900  |
| H | 1.11714500  | 5.10563500  | 0.16848000  |
| C | 2.33667000  | 3.33842600  | -0.17526300 |
| H | 3.26323900  | 3.90170000  | -0.14286200 |
| C | 2.34031500  | 1.99821800  | -0.37538600 |
| H | -1.06210300 | 3.92725600  | 0.12274700  |
| H | 3.26669500  | 1.44755600  | -0.50578300 |
| C | -2.76190000 | -0.50367500 | -0.16690800 |
| C | -3.55001900 | -0.95467400 | -1.22573300 |
| C | -4.86436700 | -1.34159800 | -0.95411300 |
| H | -3.15284200 | -1.00395800 | -2.23570200 |
| C | -4.46009800 | -0.78091500 | 1.34367000  |
| C | -5.33023300 | -1.25140100 | 0.35446000  |
| H | -5.50780800 | -1.70257000 | -1.75073400 |
| H | -4.78994400 | -0.69706500 | 2.37667400  |
| H | -6.34428700 | -1.53977500 | 0.61194600  |
| O | -1.31278600 | 1.40540200  | -0.23922200 |
| N | -3.19896800 | -0.41752000 | 1.09749900  |
| C | 2.20947900  | -0.98455900 | 0.30000000  |
| C | 3.26622000  | -1.12014900 | 1.20905200  |
| C | 2.22772900  | -1.74958900 | -0.87613100 |
| C | 4.31507800  | -2.00634700 | 0.95452000  |
| H | 3.26446900  | -0.53927100 | 2.12867700  |
| C | 3.27603600  | -2.63156800 | -1.13409300 |
| H | 1.41586400  | -1.67173600 | -1.59781000 |
| C | 4.32290300  | -2.76193600 | -0.21774800 |
| H | 5.12191400  | -2.10621100 | 1.67447700  |
| H | 3.27422800  | -3.21951800 | -2.04715600 |
| H | 5.13782100  | -3.45117900 | -0.41739100 |

**16-exo**

E (RB3LYP) = -902.345104 a.u.

|   |             |             |             |
|---|-------------|-------------|-------------|
| C | -1.39220300 | 1.31347800  | -0.54574700 |
| C | -0.38995500 | 1.99669000  | 0.16167200  |
| C | 1.05765900  | 0.08410000  | 0.12312600  |
| C | -1.13678600 | -0.06929000 | -1.12115700 |
| C | 0.38968000  | -0.31237900 | -1.19531700 |
| H | 0.60783800  | -0.50024000 | 0.93832900  |
| H | -1.51314300 | -0.07453700 | -2.15287700 |
| H | 0.61327900  | -1.36220900 | -1.40229600 |
| H | 0.82349500  | 0.29387400  | -2.00084500 |
| C | -0.61456700 | 3.28826600  | 0.65749600  |
| C | -1.84369800 | 3.90558300  | 0.45826700  |
| H | -2.01059900 | 4.90663900  | 0.84699200  |
| C | -2.85967600 | 3.23969100  | -0.23607800 |
| H | -3.82261600 | 3.71664000  | -0.39410100 |
| C | -2.62312900 | 1.95973900  | -0.72835600 |
| H | 0.18886400  | 3.78160800  | 1.19602800  |
| H | -3.40594600 | 1.43580000  | -1.27294500 |
| C | 2.54974400  | -0.18765400 | 0.11819300  |
| C | 3.50273600  | 0.83509700  | 0.11169000  |
| C | 4.85234800  | 0.48525500  | 0.08929300  |
| H | 3.18393400  | 1.87006900  | 0.13143600  |
| C | 4.17416300  | -1.80793400 | 0.07874800  |
| C | 5.20202400  | -0.86363100 | 0.07212200  |
| H | 5.61827000  | 1.25653900  | 0.08655100  |
| H | 4.40278400  | -2.87270400 | 0.06752400  |
| H | 6.24052800  | -1.18054500 | 0.05614500  |
| O | 0.85718500  | 1.47738100  | 0.39459000  |
| N | 2.87641700  | -1.48944000 | 0.10243700  |
| C | -1.85742000 | -1.20170900 | -0.38642900 |
| C | -2.13960800 | -2.38815700 | -1.08046200 |
| C | -2.22196300 | -1.12135100 | 0.96335700  |
| C | -2.75720100 | -3.46472100 | -0.44640200 |
| H | -1.87191600 | -2.46641600 | -2.13267000 |
| C | -2.83948100 | -2.19918600 | 1.60309000  |
| H | -2.03639900 | -0.20532400 | 1.51643200  |
| C | -3.10859100 | -3.37432800 | 0.90250300  |
| H | -2.96882500 | -4.37219800 | -1.00618300 |
| H | -3.11388400 | -2.11447900 | 2.65147700  |
| H | -3.59252400 | -4.21083100 | 1.39956400  |

### TS3n

E(RB3LYP) = -902.629473 a.u.

1 imaginary frequency : -361.77 cm<sup>-1</sup>

|   |             |             |             |
|---|-------------|-------------|-------------|
| C | 2.87436600  | -1.21953700 | 0.62234200  |
| C | 2.16912900  | -0.75260000 | -0.50585200 |
| C | 0.03510900  | -1.25878000 | 0.35685300  |
| C | 1.41685400  | 0.40237800  | 1.89256600  |
| C | 0.06413100  | 0.27520300  | 1.50877300  |
| H | 0.43222100  | -1.99558100 | 1.05369900  |
| H | 2.43828700  | -1.95364700 | 1.29032800  |
| H | 1.80852600  | -0.16636500 | 2.72851000  |
| H | -0.54411100 | -0.21066800 | 2.27488000  |
| C | 2.81245500  | -0.00281500 | -1.50714900 |
| C | 4.15792400  | 0.28582700  | -1.36671300 |
| H | 4.66392400  | 0.86650500  | -2.13168300 |
| C | 4.87791500  | -0.16392900 | -0.23855300 |
| H | 5.93527400  | 0.06440400  | -0.15016200 |
| C | 4.24650900  | -0.91622800 | 0.73718700  |
| H | 2.23254500  | 0.33626600  | -2.35890700 |
| H | 4.80409600  | -1.29772400 | 1.58664300  |
| C | -1.37249500 | -1.50845500 | -0.04534300 |
| C | -2.17173600 | -2.34283200 | 0.74627800  |
| C | -3.48569500 | -2.57554900 | 0.33983300  |
| H | -1.77673800 | -2.81305700 | 1.64323200  |
| C | -3.05693600 | -1.14696800 | -1.54496300 |
| C | -3.93857100 | -1.96781600 | -0.82863900 |
| H | -4.13532500 | -3.22366300 | 0.91990200  |
| H | -3.37942800 | -0.65849200 | -2.46150200 |
| H | -4.95193100 | -2.12186800 | -1.18530500 |
| O | 0.83782400  | -0.95234800 | -0.68696700 |
| N | -1.80162400 | -0.90972900 | -1.16535100 |
| C | -0.63169800 | 1.40576000  | 0.81813200  |
| C | -1.96524000 | 1.67077300  | 1.15880600  |
| C | 0.00448700  | 2.21742500  | -0.13103600 |
| C | -2.64916800 | 2.73237300  | 0.56784300  |
| H | -2.46801400 | 1.05131700  | 1.89807400  |
| C | -0.68225600 | 3.27454500  | -0.72503300 |
| H | 1.03660400  | 2.03155400  | -0.41473800 |
| C | -2.00928500 | 3.53552600  | -0.37685100 |
| H | -3.67853700 | 2.93315300  | 0.84947900  |
| H | -0.17967700 | 3.89734800  | -1.45909100 |
| H | -2.53983400 | 4.36346000  | -0.83748000 |
| H | 2.03611000  | 1.21814800  | 1.53642700  |



**TS3x**

E(RB3LYP) = -902.634514 a.u.  
1 imaginary frequency: -318.51 cm<sup>-1</sup>

|   |             |             |             |
|---|-------------|-------------|-------------|
| C | -2.74849500 | -0.70727600 | 0.82325900  |
| C | -2.58575500 | 0.56096600  | 0.23305900  |
| C | -0.22590600 | 0.57984700  | 0.40435400  |
| C | -1.19519200 | -1.34027200 | -1.20265300 |
| C | 0.04261700  | -0.70832700 | -1.01679800 |
| H | -0.22023300 | -0.12088600 | 1.23757400  |
| H | -1.96296900 | -1.16237800 | 1.41568200  |
| H | -1.95884100 | -0.90265300 | -1.83509000 |
| H | 0.25110900  | 0.07752300  | -1.74603800 |
| C | -3.65939200 | 1.22217700  | -0.38660200 |
| C | -4.89778600 | 0.60407000  | -0.41850000 |
| H | -5.73410600 | 1.10375800  | -0.89714100 |
| C | -5.07893300 | -0.66707100 | 0.16178600  |
| H | -6.05748300 | -1.13588000 | 0.13594700  |
| C | -4.01747800 | -1.31052100 | 0.78158800  |
| H | -3.48773300 | 2.19574200  | -0.83326400 |
| H | -4.16055800 | -2.27721800 | 1.25389800  |
| C | 0.94182800  | 1.49547400  | 0.33046800  |
| C | 1.90390700  | 1.48662000  | 1.34395700  |
| C | 2.94874600  | 2.41058200  | 1.26335900  |
| H | 1.83380800  | 0.79251300  | 2.17555600  |
| C | 1.98965700  | 3.18272400  | -0.80130100 |
| C | 2.99059300  | 3.27822600  | 0.17650400  |
| H | 3.71137000  | 2.44588400  | 2.03511200  |
| H | 2.00682700  | 3.83002500  | -1.67498900 |
| H | 3.78608700  | 4.00877200  | 0.07063500  |
| O | -1.38958100 | 1.21849500  | 0.17449800  |
| N | 0.98546100  | 2.30937700  | -0.73555800 |
| C | 1.23310700  | -1.50149800 | -0.57038400 |
| C | 2.47886800  | -1.24006800 | -1.15650400 |
| C | 1.13668000  | -2.49662600 | 0.41336800  |
| C | 3.60337200  | -1.97501500 | -0.78011700 |
| H | 2.56558700  | -0.46895300 | -1.91761000 |
| C | 2.26273300  | -3.22589100 | 0.79348500  |
| H | 0.18055700  | -2.71676300 | 0.88509200  |
| C | 3.49823700  | -2.96777400 | 0.19520200  |
| H | 4.56025600  | -1.77220300 | -1.25173700 |
| H | 2.17472700  | -3.99684200 | 1.55320300  |
| H | 4.37388100  | -3.53910400 | 0.48815400  |
| H | -1.37231100 | -2.35700900 | -0.86724700 |

17

E(RB3LYP) = -902.677141 a.u.

|   |             |             |             |
|---|-------------|-------------|-------------|
| C | 0.00000000  | 0.00000000  | 0.00000000  |
| C | 0.00000000  | 0.00000000  | 1.48841100  |
| C | 2.37014000  | 0.00000000  | 1.32606900  |
| C | 0.94057500  | 1.18588700  | -0.44378400 |
| C | 2.34872300  | 1.10214100  | 0.21709300  |
| H | 2.35916800  | -0.97572000 | 0.82481000  |
| H | 0.49023100  | -0.92962800 | -0.34218300 |
| H | 1.01917200  | 1.17387000  | -1.53379200 |
| H | 3.04776200  | 0.71280600  | -0.53191200 |
| C | -1.19091100 | 0.03700100  | 2.23752300  |
| C | -2.38959300 | 0.07466300  | 1.56057500  |
| H | -3.31133600 | 0.10771900  | 2.13578300  |
| C | -2.47986200 | 0.08483700  | 0.12642700  |
| H | -3.45915800 | 0.11926700  | -0.33889100 |
| C | -1.35115000 | 0.04758400  | -0.62099700 |
| H | -1.13486200 | 0.05243600  | 3.32042000  |
| H | -1.39483000 | 0.04486700  | -1.70673300 |
| C | 3.53100100  | 0.04050600  | 2.29533100  |
| C | 4.69095400  | -0.68244800 | 2.01011800  |
| C | 5.75960800  | -0.59371600 | 2.90307500  |
| H | 4.76111900  | -1.30355300 | 1.12089600  |
| C | 4.40539200  | 0.86380700  | 4.24001300  |
| C | 5.61545700  | 0.19385900  | 4.04268700  |
| H | 6.67954200  | -1.13916200 | 2.71533100  |
| H | 4.25218700  | 1.48133900  | 5.12214600  |
| H | 6.41686900  | 0.28598200  | 4.76857900  |
| O | 1.13319000  | 0.03435800  | 2.12179100  |
| N | 3.37987200  | 0.80056000  | 3.38459100  |
| C | 2.84971300  | 2.47838300  | 0.63108100  |
| C | 3.96245800  | 3.02279700  | -0.01995600 |
| C | 2.20837600  | 3.23568700  | 1.62235200  |
| C | 4.42729100  | 4.29826500  | 0.30677000  |
| H | 4.47028000  | 2.44949000  | -0.79257600 |
| C | 2.67253900  | 4.50784600  | 1.95110300  |
| H | 1.35835400  | 2.82706800  | 2.16164900  |
| C | 3.78172200  | 5.04392600  | 1.29239700  |
| H | 5.29030400  | 4.70614700  | -0.21122400 |
| H | 2.16985300  | 5.08013400  | 2.72540200  |
| H | 4.13942600  | 6.03705900  | 1.54765200  |
| H | 0.45020800  | 2.12066600  | -0.16260300 |

## 18

E(RB3LYP) = -902.685576 a.u.

|   |             |             |             |
|---|-------------|-------------|-------------|
| C | -2.50821400 | -0.81707000 | 0.33526700  |
| C | -2.49799900 | 0.66234600  | 0.18084100  |
| C | -0.11193200 | 0.51895300  | 0.45348100  |
| C | -1.40227500 | -1.44493600 | -0.59353700 |
| C | -0.07455700 | -0.63555500 | -0.57054200 |
| H | -0.14868000 | 0.14349300  | 1.48199200  |
| H | -2.17586700 | -1.01867100 | 1.37082500  |
| H | -1.79741900 | -1.48753500 | -1.61173400 |
| H | 0.05021600  | -0.14069500 | -1.53758100 |
| C | -3.67262000 | 1.39573400  | -0.07679200 |
| C | -4.85907700 | 0.70924200  | -0.20442800 |
| H | -5.76575800 | 1.27140800  | -0.41303500 |
| C | -4.95536200 | -0.71982300 | -0.08428800 |
| H | -5.92413100 | -1.19360200 | -0.20162500 |
| C | -3.84519700 | -1.45103300 | 0.17307600  |
| H | -3.61143000 | 2.47286200  | -0.18600300 |
| H | -3.89293600 | -2.53201800 | 0.27343400  |
| C | 1.00448000  | 1.52331600  | 0.29063400  |
| C | 1.79378700  | 1.90954600  | 1.37288500  |
| C | 2.80538100  | 2.84686600  | 1.15207400  |
| H | 1.62890700  | 1.48964000  | 2.36085000  |
| C | 2.12451400  | 2.90823000  | -1.14753200 |
| C | 2.97303400  | 3.35938800  | -0.13124100 |
| H | 3.44479900  | 3.16904200  | 1.96833300  |
| H | 2.22678100  | 3.28635800  | -2.16227600 |
| H | 3.74416400  | 4.09134300  | -0.34891900 |
| O | -1.37139100 | 1.29907700  | 0.26659600  |
| N | 1.16051000  | 2.00506300  | -0.95053300 |
| C | 1.14715400  | -1.51009000 | -0.31473400 |
| C | 2.20087500  | -1.52635800 | -1.23575400 |
| C | 1.24449700  | -2.30193300 | 0.83925200  |
| C | 3.32700100  | -2.31996800 | -1.01122300 |
| H | 2.14082600  | -0.91273800 | -2.13064900 |
| C | 2.37089400  | -3.09217900 | 1.06711000  |
| H | 0.43720500  | -2.31405600 | 1.57041200  |
| C | 3.41509400  | -3.10333600 | 0.14009200  |
| H | 4.13399100  | -2.32599600 | -1.73804700 |
| H | 2.43146300  | -3.70037200 | 1.96498400  |
| H | 4.29078600  | -3.72151400 | 0.31406800  |
| H | -1.24222700 | -2.47304700 | -0.26192000 |
